# Supplementary material for: The nucleosome DNA entry-exit site is important for transcription termination and prevention of pervasive transcription
Source: eLife. 2020 Aug 26;9:e57757. doi: 10.7554/eLife.57757 (PMC7449698; doi:10.7554/eLife.57757)
Supplement: Figure 2—source data 1. [file elife-57757-fig2-data1.xlsx]

## Sheet: 3' Extension Index H3 T45A
Figure 2 Source Data
	Raw Reads	Raw Reads		Raw Reads	Raw Reads
SNR	WT_1	WT_2	Average WT	T45A_1	T45A_2	Average T45A			Fold Change
snR17b	1	2	1.5	3	11	7		snR17b	4.66667
snR60	29	29	29	123	128	125.5		snR60	4.32759
snR43	20	9	14.5	43	52	47.5		snR43	3.27586
snR45	37	28	32.5	70	103	86.5		snR45	2.66154
snR190	68	63	65.5	150	190	170		snR190	2.59542
snR3	66	38	52	142	127	134.5		snR3	2.58654
snR81	8	6	7	13	22	17.5		snR81	2.5
snR56	62	41	51.5	151	106	128.5		snR56	2.49515
snR53	6	9	7.5	14	23	18.5		snR53	2.46667
snR68	17	14	15.5	31	39	35		snR68	2.25806
snR39B	47	39	43	87	99	93		snR39B	2.16279
snR48	32	30	31	60	66	63		snR48	2.03226
snR32	41	14	27.5	46	65	55.5		snR32	2.01818
snR71	33	32	32.5	48	82	65		snR71	2
snR66	67	51	59	115	121	118		snR66	2
snR128	5406	4287	4846.5	9954	9429	9691.5		snR128	1.99969
snR63	18	12	15	20	39	29.5		snR63	1.96667
snR36	16	7	11.5	26	15	20.5		snR36	1.78261
snR47	30	31	30.5	58	47	52.5		snR47	1.72131
snR72	16	13	14.5	18	31	24.5		snR72	1.68966
snR59	19	21	20	35	30	32.5		snR59	1.625
snR69	44	38	41	54	79	66.5		snR69	1.62195
snR86	17	16	16.5	26	26	26		snR86	1.57576
snR51	1500	1049	1274.5	2043	1914	1978.5		snR51	1.55237
snR87	15	5	10	12	19	15.5		snR87	1.55
snR64	144	116	130	184	211	197.5		snR64	1.51923
snR84	17	13	15	20	25	22.5		snR84	1.5
snR9	17	7	12	28	8	18		snR9	1.5
snR58	23	14	18.5	28	27	27.5		snR58	1.48649
snR39	64	58	61	104	75	89.5		snR39	1.46721
snR75	32	7	19.5	24	33	28.5		snR75	1.46154
snR77	73	62	67.5	97	97	97		snR77	1.43704
snR34	113	62	87.5	129	115	122		snR34	1.39429
snR40	74	68	71	100	92	96		snR40	1.35211
snR50	25	15	20	21	33	27		snR50	1.35
snR4	82	58	70	88	95	91.5		snR4	1.30714
snR8	95	64	79.5	104	102	103		snR8	1.2956
snR82	106	62	84	104	112	108		snR82	1.28571
snR46	143	73	108	146	131	138.5		snR46	1.28241
snR5	47	40	43.5	52	58	55		snR5	1.26437
snR17a	387	338	362.5	493	419	456		snR17a	1.25793
snR73	114	54	84	94	109	101.5		snR73	1.20833
snR10	316	249	282.5	342	336	339		snR10	1.2
snR62	22	16	19	20	23	21.5		snR62	1.13158
snR74	149	145	147	152	178	165		snR74	1.12245
snR57	163	142	152.5	154	180	167		snR57	1.09508
snR54	355	303	329	308	404	356		snR54	1.08207
snR30	419	281	350	387	349	368		snR30	1.05143
snR70	446	314	380	407	389	398		snR70	1.04737
snR79	22	31	26.5	31	23	27		snR79	1.01887
snR11	254	229	241.5	269	220	244.5		snR11	1.01242
snR49	136	101	118.5	117	112	114.5		snR49	0.966245
snR18	208	146	177	144	193	168.5		snR18	0.951977
snR31	21	12	16.5	17	14	15.5		snR31	0.939394
snR161	14	11	12.5	19	4	11.5		snR161	0.92
snR13	153	99	126	115	115	115		snR13	0.912698
snR41	92	66	79	78	62	70		snR41	0.886076
snR67	351	270	310.5	216	334	275		snR67	0.885668
snR55	203	150	176.5	151	161	156		snR55	0.883853
snR83	22	19	20.5	17	19	18		snR83	0.878049
snR61	104	83	93.5	88	71	79.5		snR61	0.850267
snR14	13	7	10	6	11	8.5		snR14	0.85
snR85	14	5	9.5	10	5	7.5		snR85	0.789474
snR80	18	5	11.5	8	10	9		snR80	0.782609
snR191	70	57	63.5	38	59	48.5		snR191	0.76378
snR78	44	19	31.5	25	23	24		snR78	0.761905
snR189	6	6	6	1	8	4.5		snR189	0.75
snR42	6	3	4.5	5	1	3		snR42	0.666667
snR38	967	702	834.5	479	585	532		snR38	0.637507
snR65	1513	968	1240.5	678	857	767.5		snR65	0.618702
snR76	288	178	233	132	148	140		snR76	0.600858
snR24	8440	6207	7323.5	4533	3565	4049		snR24	0.552878
snR44	771	674	722.5	152	135	143.5		snR44	0.198616

## Sheet: 3' Extension Index H3 R52A
	Raw Reads	Raw Reads		Raw Reads	Raw Reads
SNR	WT_1	WT_2	Average WT	R52A_1	R52A_2	Average R52A			Fold Change
snR53	6	9	7.5	51	46	48.5		snR53	6.46667
snR189	6	6	6	20	45	32.5		snR189	5.41667
snR17b	1	2	1.5	6	10	8		snR17b	5.33333
snR43	20	9	14.5	54	98	76		snR43	5.24138
snR72	16	13	14.5	65	71	68		snR72	4.68966
snR68	17	14	15.5	42	92	67		snR68	4.32258
snR71	33	32	32.5	86	147	116.5		snR71	3.58462
snR81	8	6	7	17	29	23		snR81	3.28571
snR69	44	38	41	71	188	129.5		snR69	3.15854
snR42	6	3	4.5	7	21	14		snR42	3.11111
snR45	37	28	32.5	88	105	96.5		snR45	2.96923
snR87	15	5	10	25	32	28.5		snR87	2.85
snR63	18	12	15	34	47	40.5		snR63	2.7
snR36	16	7	11.5	30	29	29.5		snR36	2.56522
snR59	19	21	20	34	68	51		snR59	2.55
snR84	17	13	15	32	44	38		snR84	2.53333
snR9	17	7	12	32	28	30		snR9	2.5
snR32	41	14	27.5	50	83	66.5		snR32	2.41818
snR66	67	51	59	105	168	136.5		snR66	2.31356
snR64	144	116	130	212	382	297		snR64	2.28462
snR51	1500	1049	1274.5	2387	3267	2827		snR51	2.21812
snR39B	47	39	43	96	93	94.5		snR39B	2.19767
snR60	29	29	29	60	63	61.5		snR60	2.12069
snR56	62	41	51.5	109	107	108		snR56	2.09709
snR48	32	30	31	59	71	65		snR48	2.09677
snR4	82	58	70	103	174	138.5		snR4	1.97857
snR86	17	16	16.5	28	37	32.5		snR86	1.9697
snR74	149	145	147	233	323	278		snR74	1.89116
snR58	23	14	18.5	25	42	33.5		snR58	1.81081
snR31	21	12	16.5	24	35	29.5		snR31	1.78788
snR46	143	73	108	159	223	191		snR46	1.76852
snR17a	387	338	362.5	515	757	636		snR17a	1.75448
snR3	66	38	52	59	118	88.5		snR3	1.70192
snR62	22	16	19	27	35	31		snR62	1.63158
snR39	64	58	61	79	118	98.5		snR39	1.61475
snR83	22	19	20.5	27	39	33		snR83	1.60976
snR77	73	62	67.5	101	116	108.5		snR77	1.60741
snR50	25	15	20	23	41	32		snR50	1.6
snR70	446	314	380	501	705	603		snR70	1.58684
snR128	5406	4287	4846.5	6751	8597	7674		snR128	1.58341
snR73	114	54	84	106	156	131		snR73	1.55952
snR40	74	68	71	86	131	108.5		snR40	1.52817
snR47	30	31	30.5	48	42	45		snR47	1.47541
snR5	47	40	43.5	54	72	63		snR5	1.44828
snR10	316	249	282.5	305	507	406		snR10	1.43717
snR78	44	19	31.5	33	56	44.5		snR78	1.4127
snR14	13	7	10	11	17	14		snR14	1.4
snR82	106	62	84	81	146	113.5		snR82	1.35119
snR65	1513	968	1240.5	1261	2078	1669.5		snR65	1.34583
snR34	113	62	87.5	82	153	117.5		snR34	1.34286
snR75	32	7	19.5	25	24	24.5		snR75	1.25641
snR67	351	270	310.5	316	450	383		snR67	1.23349
snR190	68	63	65.5	57	102	79.5		snR190	1.21374
snR18	208	146	177	195	232	213.5		snR18	1.20621
snR161	14	11	12.5	11	19	15		snR161	1.2
snR8	95	64	79.5	84	98	91		snR8	1.14465
snR54	355	303	329	302	445	373.5		snR54	1.13526
snR79	22	31	26.5	27	33	30		snR79	1.13208
snR30	419	281	350	352	440	396		snR30	1.13143
snR61	104	83	93.5	79	131	105		snR61	1.12299
snR191	70	57	63.5	56	86	71		snR191	1.11811
snR80	18	5	11.5	13	12	12.5		snR80	1.08696
snR13	153	99	126	89	167	128		snR13	1.01587
snR57	163	142	152.5	110	190	150		snR57	0.983607
snR55	203	150	176.5	146	201	173.5		snR55	0.983003
snR49	136	101	118.5	89	136	112.5		snR49	0.949367
snR11	254	229	241.5	175	252	213.5		snR11	0.884058
snR38	967	702	834.5	501	970	735.5		snR38	0.881366
snR41	92	66	79	45	92	68.5		snR41	0.867089
snR76	288	178	233	168	228	198		snR76	0.849785
snR44	771	674	722.5	484	652	568		snR44	0.786159
snR24	8440	6207	7323.5	3727	5378	4552.5		snR24	0.621629
snR85	14	5	9.5	5	5	5		snR85	0.526316
