# Supplementary material for: The nucleosome DNA entry-exit site is important for transcription termination and prevention of pervasive transcription
Source: eLife. 2020 Aug 26;9:e57757. doi: 10.7554/eLife.57757 (PMC7449698; doi:10.7554/eLife.57757)
Supplement: Figure 5—source data 1. [file elife-57757-fig5-data1.xlsx]

## Sheet: H3K36me3 Western Source Data
Figure 5A Source Data
		Rep 1				Rep 2				Rep 3				Rep 4
	H3	H3K36me3	K36me3/H3		H3	H3K36me3	K36me3/H3		H3	H3K36me3	K36me3/H3		H3	H3K36me3	K36me3/H3			Average K36me3	Standard Dev.	Standard Error	p Value
WT	5475.3	9340.54	1		2541.01	5840.82	1		3585.33	6357.35	1		3585.33	6357.35	1		WT	1	2.09946e-10	1.04973e-10
R40A	5502.15	8980.83	0.956796		4823.79	4653.9	0.419722		3781.38	6388.4	0.449798		3781.38	6388.4	0.952785		R40A	0.694775	0.300495	0.150248	0.0884824
K42A	4199.15	6641.78	0.927168		3263.38	4766.15	0.635379		3245.08	7668.23	0.62492		3245.08	7668.23	1.33267		K42A	0.880034	0.332685	0.166342	0.497913
G44A	5183.1	4322.03	0.488803		3721.08	2892.76	0.338202		3368.91	4297.03	0.572276		3368.91	4297.03	0.719336		G44A	0.529654	0.159289	0.0796443	0.00104807
T45A	4093.74	5581.71	0.79925		4079.2	3545.2	0.378092		4471.62	2831.38	0.360964		4471.62	2831.38	0.357096		T45A	0.473851	0.217125	0.108562	0.00286177
V46A	6200.64	4373.23	0.413429		4529.74	2796.52	0.268582		4297.91	2984.79	0.286182		4297.91	2984.79	0.39166		V46A	0.339963	0.0731606	0.0365803	1.86447e-06
R49A	6095.1	1092.26	0.105046		3985.2	842.062	0.0919234		4754.86	707.113	0.0917636		4754.86	707.113	0.0838694		R49A	0.0931506	0.0087762	0.0043881	8.66144e-13
R52A	4913.98	648.82	0.0773974		3922.08	1111.65	0.123306		3433.08	790.82	0.107508		3433.08	790.82	0.129911		R52A	0.10953	0.0233934	0.0116967	3.45771e-10
Q93A	7778.47	5357.64	0.403752		3101.08	3585.47	0.502997		2330.01	6755.23	0.588855		2330.01	6755.23	1.63506		Q93A	0.782667	0.573275	0.286638	0.477037
I112A	6443.1	4309.81	0.392102		6264.98	2695.69	0.18719		5272.79	5033.69	0.396154		5272.79	5033.69	0.538392		I112A	0.378459	0.144524	0.0722621	0.000135819
R78A	4529.69	5098.69	0.65982		4485.45	2360.57	0.228952		3298.38	5488.1	0.473561		3298.38	5488.1	0.938372		R78A	0.575176	0.299596	0.149798	0.0297234
bre1∆	4990.81	4254.15	0.499664		3737.33	1111.26	0.129356		3360.5	5244.74	0.610998		3360.5	5244.74	0.880183		bre1∆	0.53005	0.311248	0.155624	0.0234037
dot1∆	5514.52	8227.35	0.874557		3388.2	2757.98	0.354123		2591.38	6395.98	0.825297		2591.38	6395.98	1.39197		dot1∆	0.861487	0.424386	0.212193	0.538096
set1∆	5053.98	6456.35	0.74884		3875.15	2190.08	0.245869		3427.91	6713.18	0.716499		3427.91	6713.18	1.10446		set1∆	0.703918	0.352335	0.176168	0.143823
set2∆	3571.5	1256.72	0.206264		1192.06	128.385	0.0468542		3030.2	203.778	0.117695		3030.2	203.778	0.0379261		set2∆	0.102185	0.078025	0.0390125	4.41125e-07
