# Supplementary material for: The nucleosome DNA entry-exit site is important for transcription termination and prevention of pervasive transcription
Source: eLife. 2020 Aug 26;9:e57757. doi: 10.7554/eLife.57757 (PMC7449698; doi:10.7554/eLife.57757)
Supplement: Figure 7—source data 1. [file elife-57757-fig7-data1.xlsx]

## Sheet: Norm. H2A ChIP SB Source Data 
Figure 7C Source Data
H2A	SB WT 1	SB WT 2	SB WT 3		No SB WT 1	No SB WT 2	No SB WT 3		Average	+SB	-SB
IP	23.186	23.286	23.293		23.08	22.856	23.369		WT	0.238121	0.14849
IN	21.36	21.739	21.724		21.407	21.262	21.535		H3 R52A	0.274001	0.134406
									Standard Dev
Efficiency	1.94	1.94	1.94		1.94	1.94	1.94		WT	0.0350405	0.0193891
									H3 R52A	0.0123395	0.0224271
Occupancy	0.298177	0.358732	0.35354		0.329995	0.347732	0.2966		Standard Err
									WT	0.0202306	0.0111943
	SB R52A 1	SB R52A 2	SB R52A 3		No SB R52A 1	No SB R52A 2	No SB R52A 3		H3 R52A	0.00712422	0.0129483
IP	22.117	22.759	22.453		23.203	22.733	23.207
IN	22.338	22.237	22.143		21.175	21.958	21.257
Efficiency	1.94	1.94	1.94		1.94	1.94	1.94
Relative Occupancy	1.15772	0.707567	0.814294		0.260818	0.598348	0.274654
GAL1 Nucleosome-Bound	SB WT 1	SB WT 2	SB WT 3		No SB WT 1	No SB WT 2	No SB WT 3
IP	21.905	22.377	21.807		21.91	21.505	22.244
IN	22.392	22.753	22.508		23.338	22.72	23.122
Efficiency	1.93	1.93	1.93		1.93	1.93	1.93
Occupancy	1.37742	1.28047	1.58553		2.55727	2.22306	1.78123
	SB R52A 1	SB R52A 2	SB R52A 3		No SB R52A 1	No SB R52A 2	No SB R52A 3
IP	21.285	22.166	21.826		22.189	21.094	21.774
IN	23.543	23.553	23.433		22.91	23.547	22.678
Efficiency	1.93	1.93	1.93		1.93	1.93	1.93
Occupancy	4.41355	2.48925	2.87667		1.60652	5.01732	1.81194
